# Supplementary material
Source: PubMed Central journal article supplement (PMC4221191)

## Supplementary Figure Legends

**Supplementary Figure S1. Genotyping of Mmp1a-knockout offspring from heterozygote crosses in C57BL/6 mice.** (a) PCR based genotyping of 21 day old pups born from heterozygote parents with the Mmp1a-knockout allele (back-crossed 10 generations into the C57BL/6 strain). Agarose gel (2%) showing the Mmp1a wild-type (200 bp amplicon) or knockout allele (470 bp amplicon). (b) Number of wild type, heterozygote, and knockout offspring from heterozygote crosses. P value was calculated by Chi-squared test. (c) Mmp1a immunofluorescence of *Mmp1a*<sup>+/+</sup> (WT) or *Mmp1a*<sup>-/-</sup> (KO) MEFs using either FITC-secondary Ab alone (top panels) or Mmp1a antibody (bottom panels) at 1:20 dilutions, counterstained with DAPI (blue nuclei).

**Supplementary Figure S2. Effect of Mmp1a-deficiency on experimental metastasis of LLC1 cells to lung.**  $1 \times 10^6$  LLC1 cells were directly inoculated into the venous circulation by tail vein injection in 6-8 week old female *Mmp1a*<sup>+/+</sup> (WT) or *Mmp1a*<sup>-/-</sup> (KO) mice. Lungs were harvested 28 d later. Data shown are total number of metastatic nodules from H&E coronal sections at three different depths.

**Supplementary Figure S3. Recombinant Mmp1a reconstitutes media from Mmp1a-deficient MEFs in endothelial tube formation assays.** HUVECs were assessed for tube formation following 5 h exposure to *Mmp1a*<sup>+/+</sup> (WT) or *Mmp1a*-deficient (KO) MEF conditioned media with or without purified recombinant Mmp1a protein (20 nM). (a)

Representative micrographs and (b) quantification of average tubal length. Data shown are mean  $\pm$  SEM \*  $p < 0.05$ , \*\*  $p < 0.005$  by ANOVA/SNK

**Supplementary Figure S4. Mmp1a cleaves PAR1.** N-terminal exodomain cleavage of T7-PAR1 by thrombin (10 nM), or affinity purified His-tagged human MMP1 (10 nM) or Mmp1a (10 nM). Cleavage was measured by loss of the N-terminal T7 epitope from PAR1 expressed on the surface of Cos7 cells over 30 min as measured by flow cytometry.

**Supplementary Figure S5. Heterologous expression and secretion of the mouse collagenases.** (a) Western blot analysis (Myc-Ab) of conditioned media (40  $\mu$ l per lane) from cell lines (HEK293T, CHOK1, COS7) that were transiently transfected with the mouse collagenases Mmp1a, Mmp1b, Mmp8, Mmp13 and human MMP1. All MMPs were tagged at the C-terminus with a Myc-tag. (b) Semi-quantitative PCR of cDNA generated from MMP1, Mmp1a, or Mmp1b transfected HEK293T cells using a universal primer for the tagged region in the transcript of the transfected gene (pCMV6, 75 nt amplicon) or control (actin, 225 nt amplicon). (c) Western blot analysis (Myc-Ab) of conditioned media (40  $\mu$ l) from HEK293T cells transiently transfected with a signal peptide chimera construct P2S Mmp1a. (d) Time course western blot analysis (Myc-Ab) of hMMP1 or Mmp1a transfected HEK293T cell lysates following treatment with cycloheximide (10  $\mu$ g/mL) after 24 h transfection (time 0) to inhibit protein synthesis. pro- prodomain, act- activated enzyme, hpx- C-terminal hemopexin domain.

# Supplementary Figure S1

## A

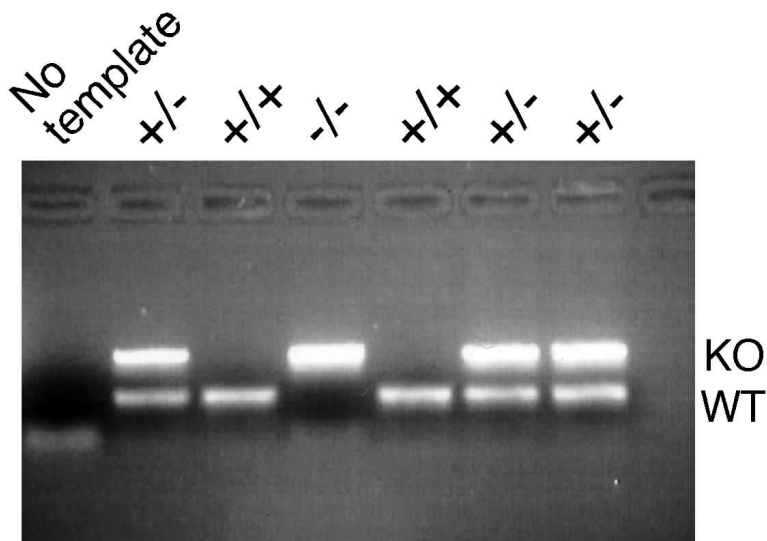

## B

10 generation back-crossed C57/BL6

| Genotype | Number | Percentage |
|----------|--------|------------|
| +/+      | 27     | 30%        |
| +/-      | 35     | 40%        |
| -/-      | 26     | 30%        |

total n=88     $P=0.16$

## C

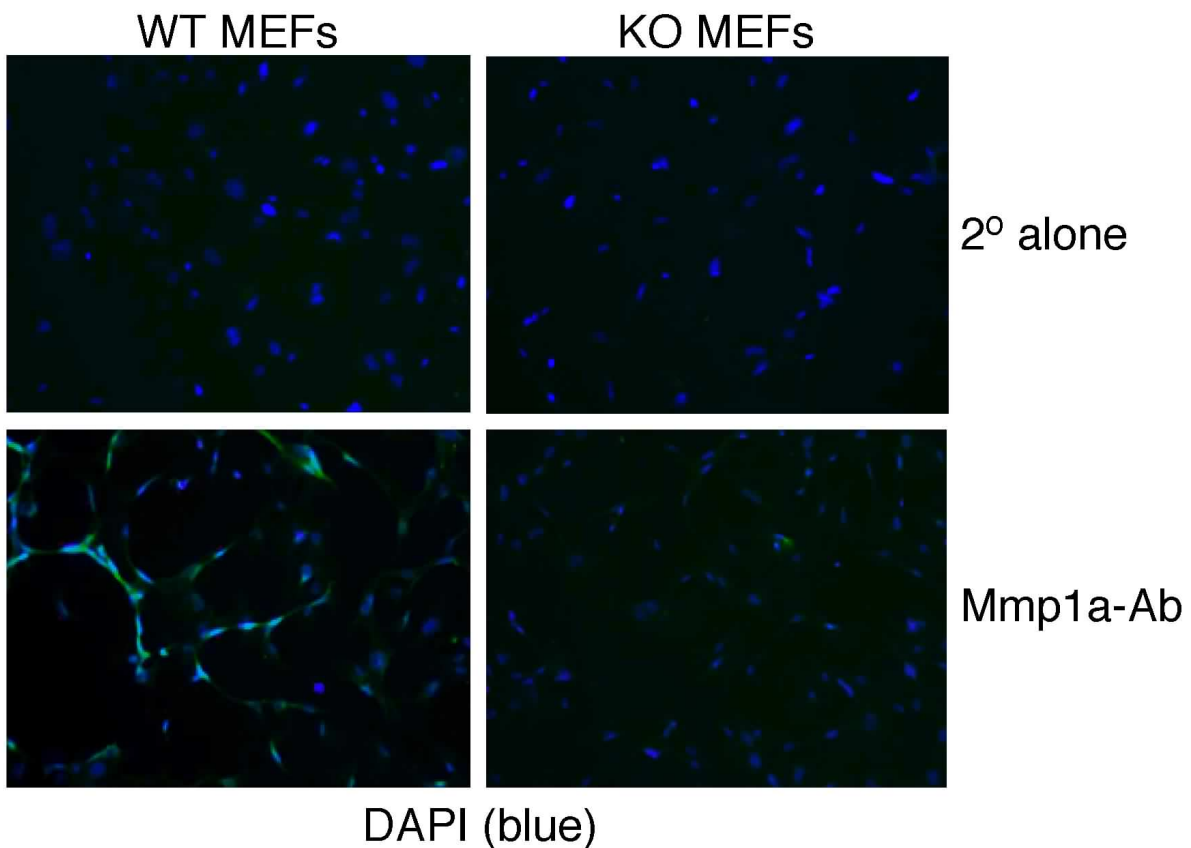

# Supplementary Figure S2

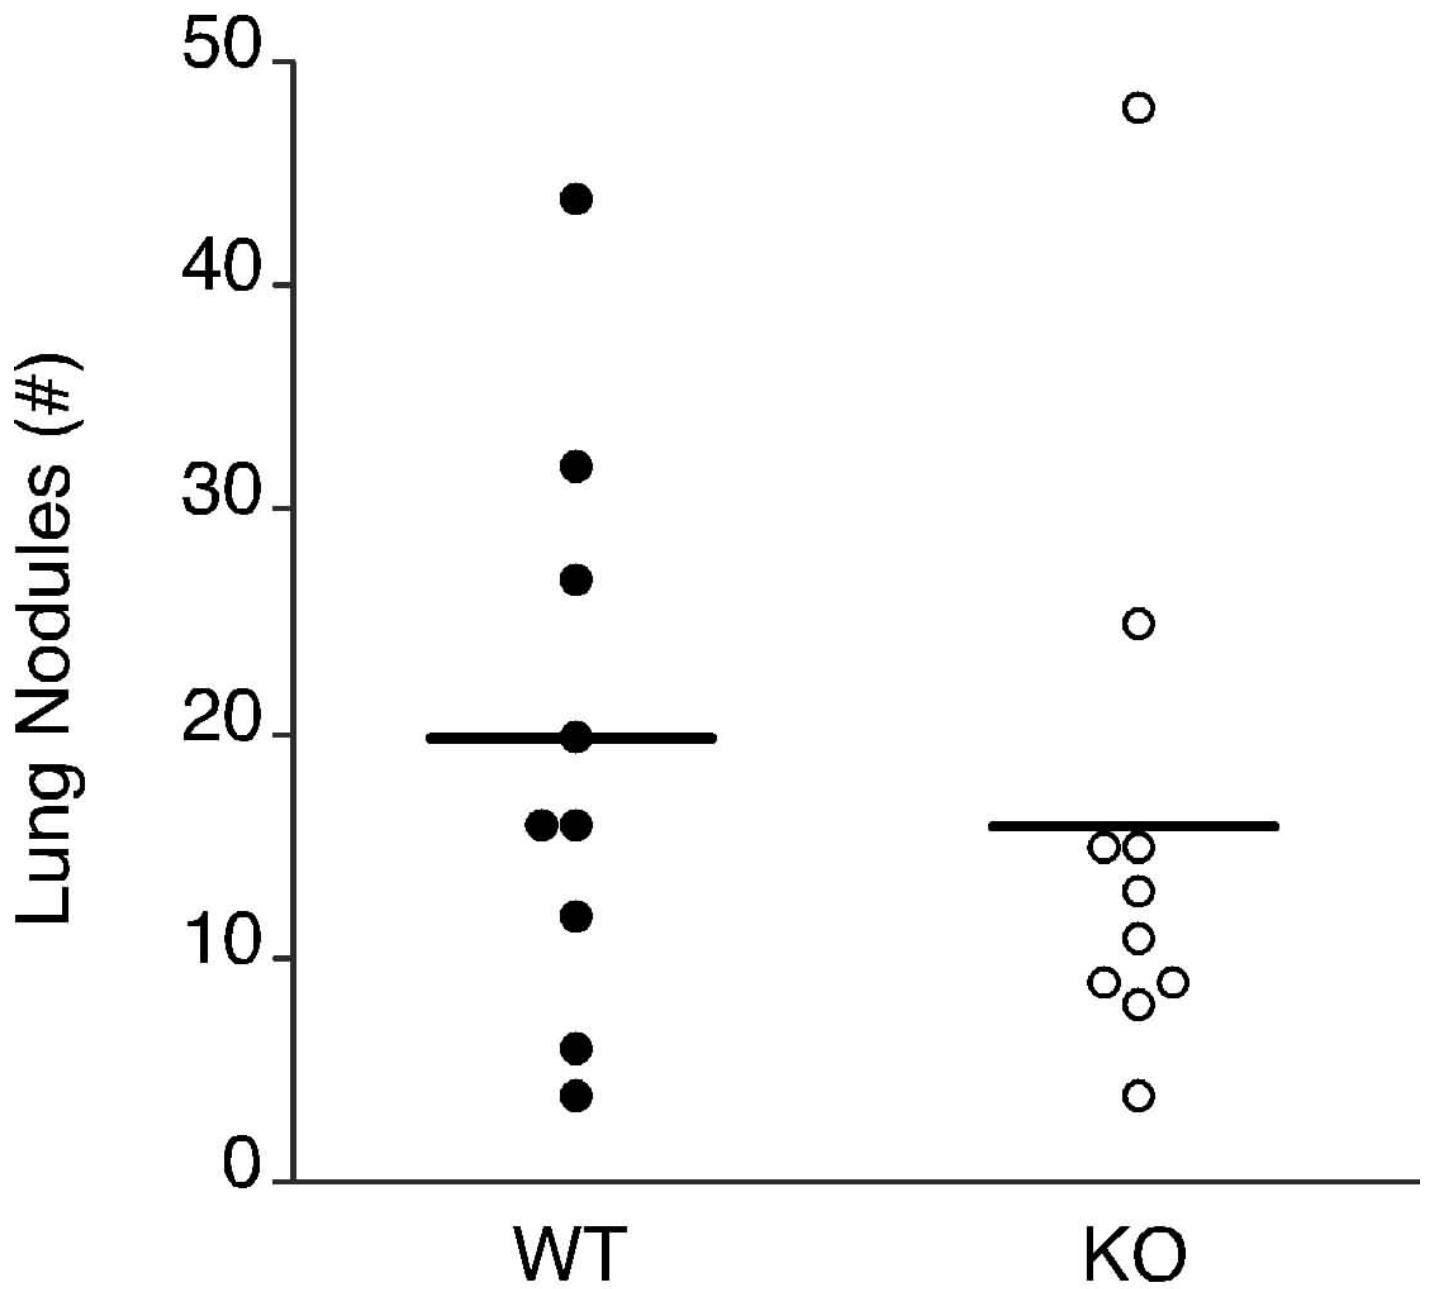

**A**

WT

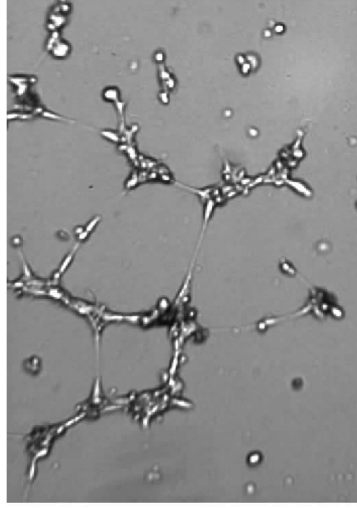

KO

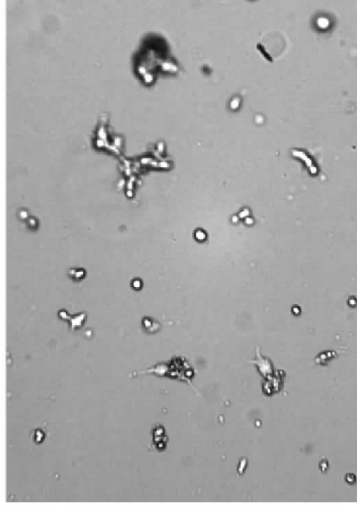

WT + Mmp1a

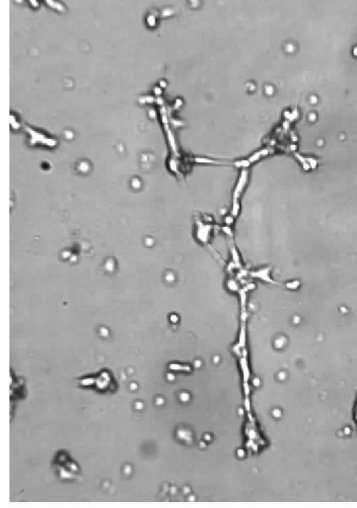

KO + Mmp1a

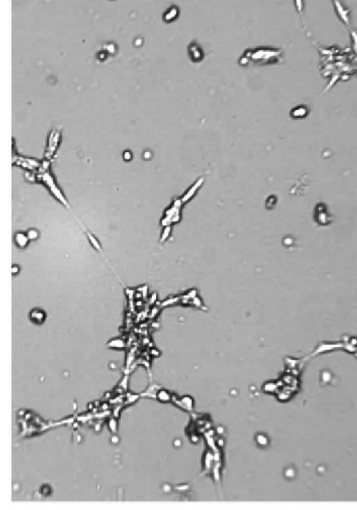

**B**

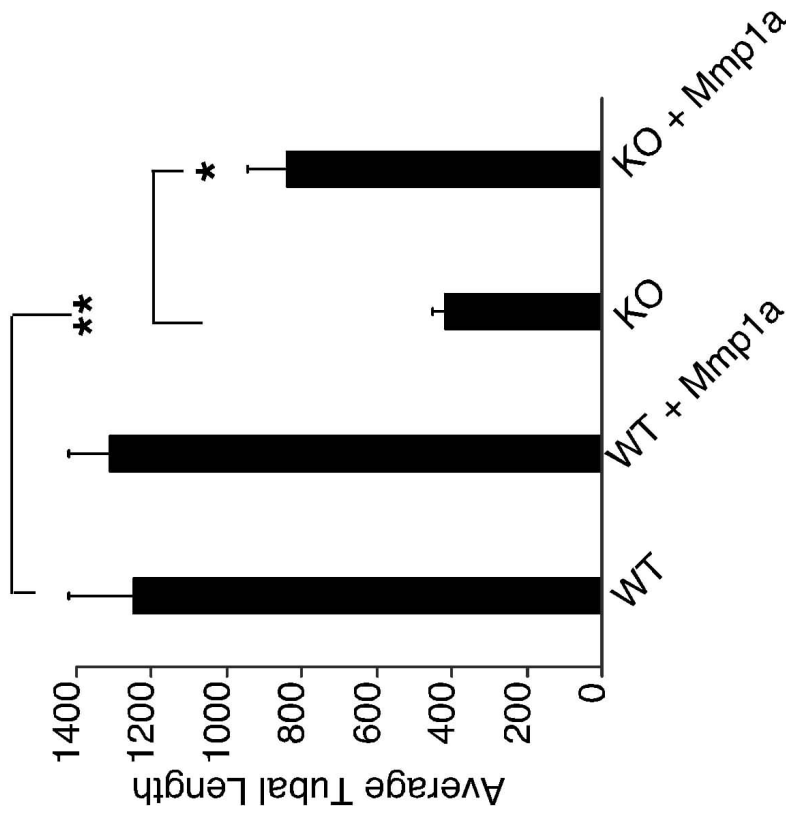

# Supplementary Figure S4

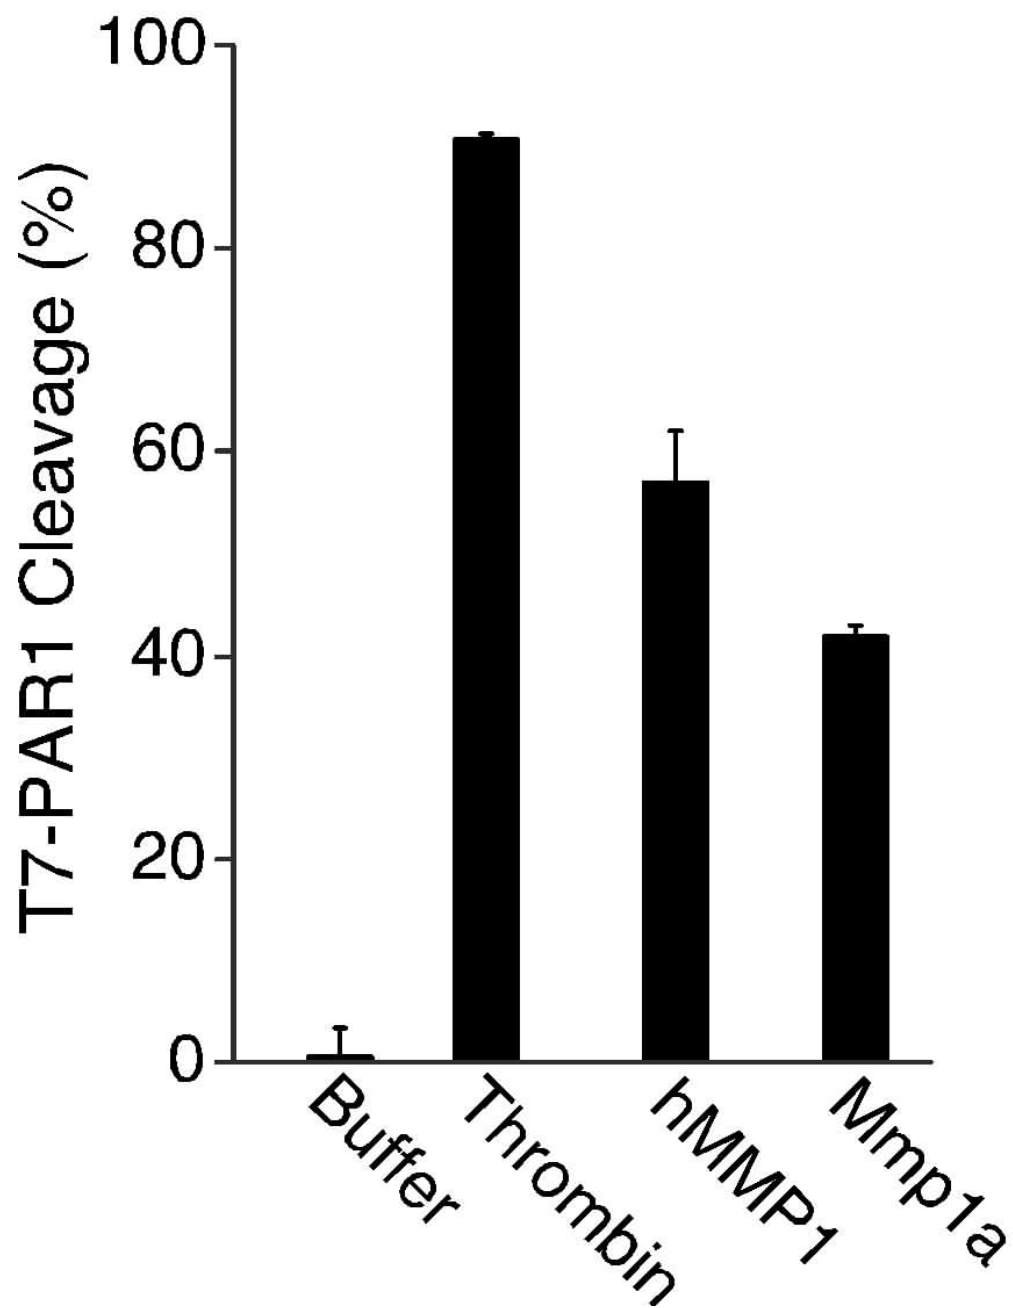

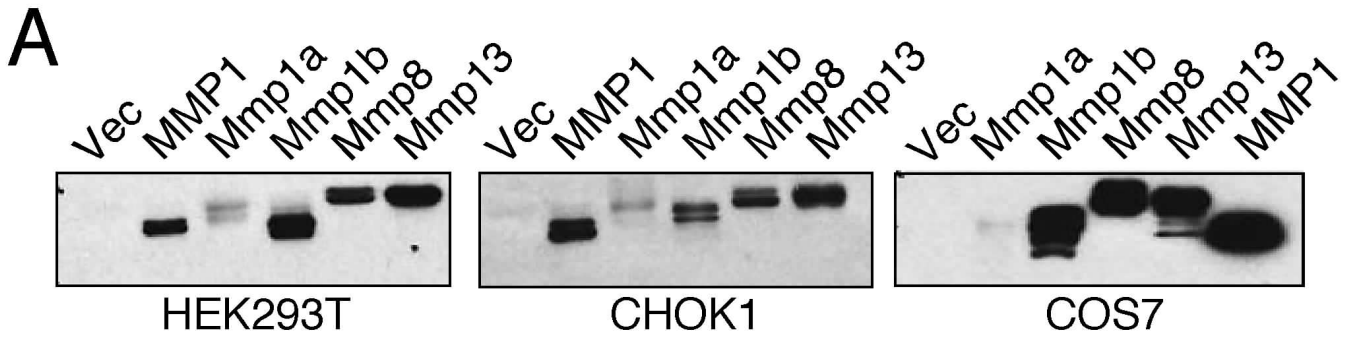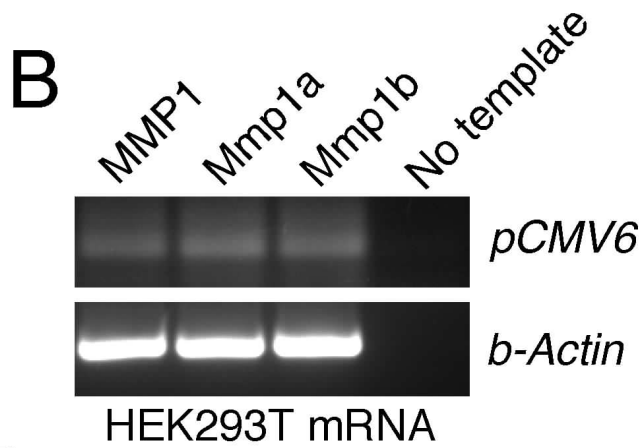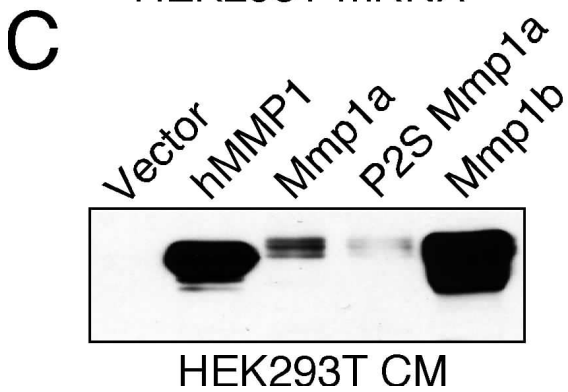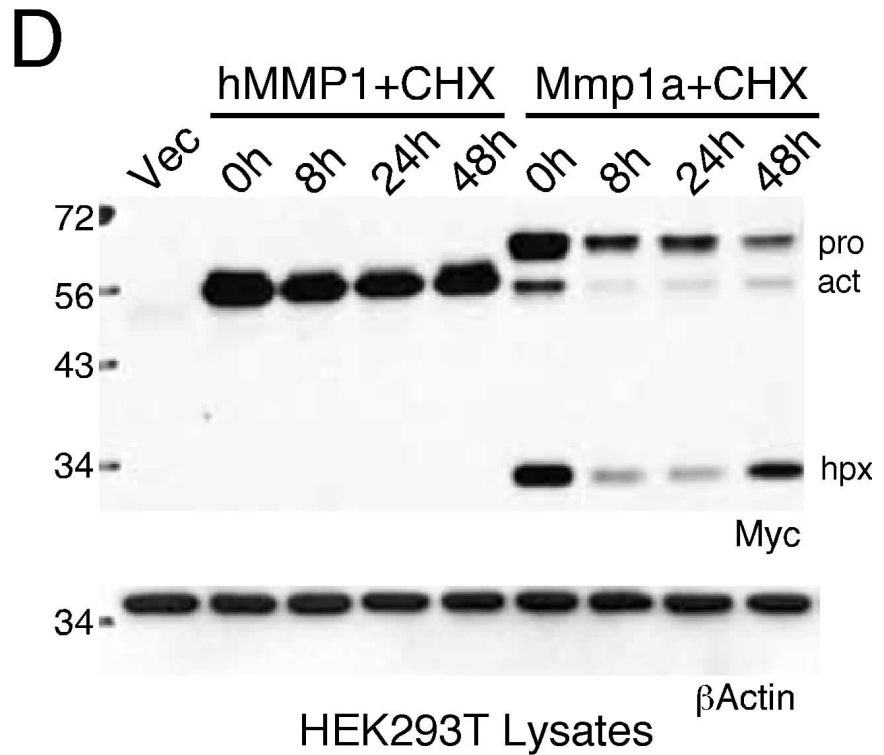

Supplement: NIHMS486926-supplement-Supplementary_Data.pdf [file NIHMS486926-supplement-Supplementary_Data.pdf]
